# Supplementary material for: In Vitro Feasibility Analysis of a New Sutureless Wound-Closure System Based on a Temperature-Regulated Laser and a Transparent Collagen Membrane for Laser Tissue Soldering (LTS)
Source: MDPI journal article supplement (doi:10.3390/ijms21197104), 2020-09-26
Supplement: s1 [file s1]

Membrane + bioadhesive  
Specimen 1

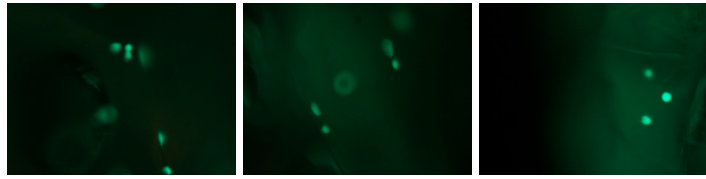

Membrane + bioadhesive  
Specimen 2

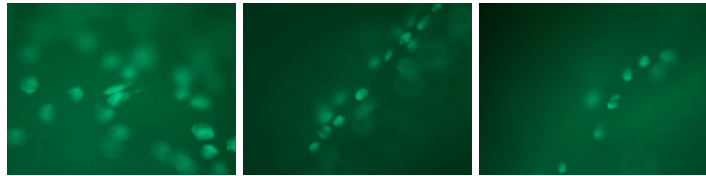

**Supplemental Figure S1.** L929 cells grown on the laser-welded membrane + bioadhesive. Vital and dead cells show green and red fluorescence, respectively. Three different areas of each of two specimens of the laser-welded membrane are shown to demonstrate that the cells are attached and alive in different focal planes of the membrane.
